# Supplementary material for: Electrochemical sensor based on polyoxometalate immobilized using a layer-by-layer assembly process to detect 2,4-dinitrophenylhydrazine
Source: Royal Society of Chemistry journal article supplement (doi:10.1039/d2nj00312k), 2022-01-01
Supplement: d2nj00312k1.pdf [file d2nj00312k1.pdf]

## Electronic supplementary information

*New Journal of Chemistry*

### Electrochemical Sensor Based on Polyoxometalate Immobilized Using a Layer by Layer Assembly Process to Detect 2,4-Dinitrophenylhydrazine

Xiaoxia Yu, Jianye Pei, Lihua Bi\*

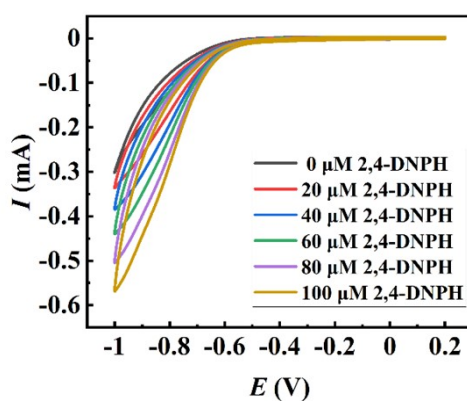

**Fig. S1** CV curves of bare ITO in 0, 40, 60, 80, 100  $\mu\text{M}$  2,4-DNPH solution (pH 3.0) at scan rate of 50  $\text{mV}\cdot\text{s}^{-1}$ .

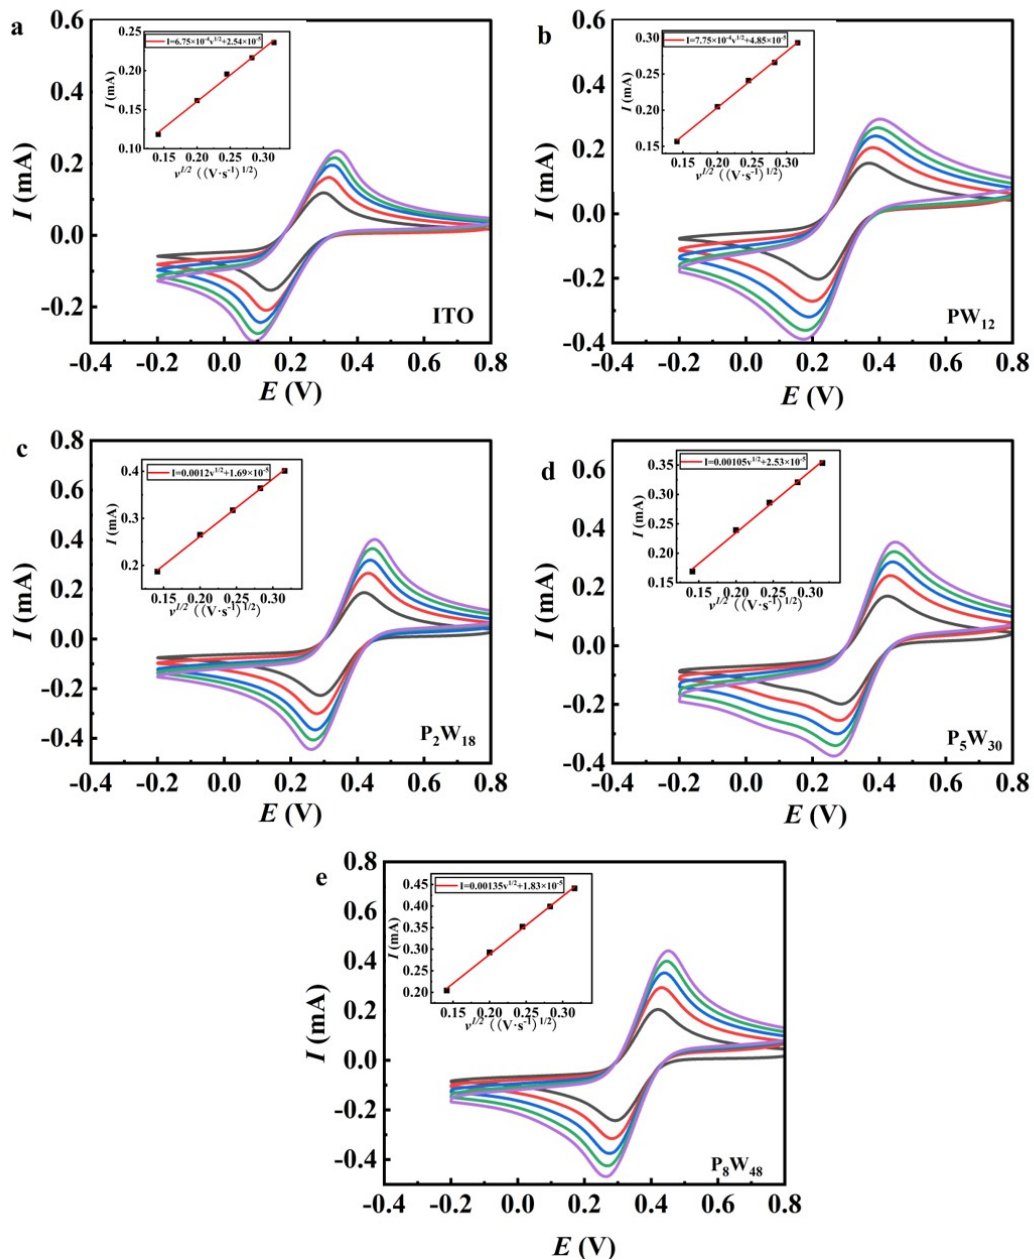

**Fig. S2** CV curves of the bare ITO,  $(PW_{12}/PDDA)_6$ ,  $(P_2W_{18}/PDDA)_6$ ,  $(P_5W_{30}/PDDA)_6$  and  $(P_8W_{48}/PDDA)_6$  electrode in the mixture solution of 1.0 mM  $[Fe(CN)_6]^{3-/4-}$  and 0.1 M KCl with different scan rates from 20 to 100  $mV \cdot s^{-1}$  and the linear relationship between the peak current and the square root of the scan rates at 0.4 V.

**Fig. S3** CV curves of  $(PW_{12}/PDDA)_6$ (a),  $(P_2W_{18}/PDDA)_6$ (b),  $(P_5W_{30}/PDDA)_6$ (c),  $(P_8W_{48}/PDDA)_6$ (d) in 0.5 M sodium sulfate solution (pH 3.0) at scan rate of 50  $mV \cdot s^{-1}$ .

**Fig. S4** (a) CV curves of  $P_8W_{48}$  in solution (pH 7.0) at different scan rates from 10 to 100  $mV \cdot s^{-1}$  and (b) the linear relationship between the peak currents and the square roots of the scan rates; (c) CV curves of  $(P_8W_{48}/PDDA)_7$  in solution (pH 7.0) with different scan rates from 10 to 100  $mV \cdot s^{-1}$  and (d) the linear relationship between the peak currents and the scan rates.

**Fig. S5.** (a) CV curves of  $(P_8W_{48}/PDDA)_7$  modified electrode at the different concentrations of 2,4-DNPH (0, 20, 40, 60, 80, 100  $\mu M$ ) using the scan rate of 50  $mV \cdot s^{-1}$  and (b) its linear relationship between the reduction peak currents at -0.68 V and the concentrations of 2,4-DNPH.

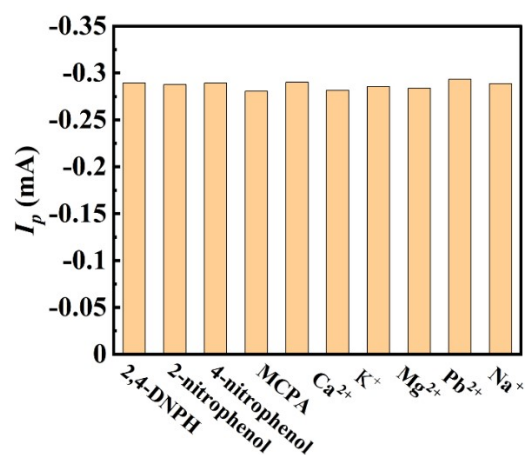

**Fig. S6** Chart of  $(P_8W_{48}/PDDA)_7$  modified electrode in 20  $\mu M$  2,4-DNPH solution with 40  $\mu M$  2-nitrophenol, 4-dinitrophenol, 4-chloro-2-methylphenol,  $Ca^{2+}$ ,  $K^+$ ,  $Mg^{2+}$ ,  $Pb^{2+}$  or  $Na^+$  at pH 7.0.

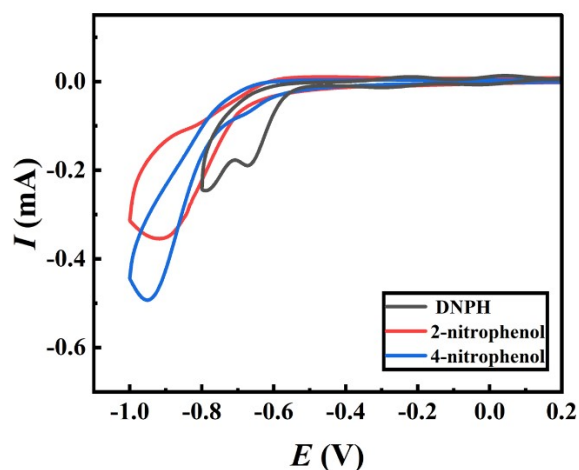

**Fig. S7** CV curves of  $(P_8W_{48}/PDDA)_6$  in 20  $\mu\text{M}$  2,4-DNPH, 40  $\mu\text{M}$  2-nitrophenol and 40  $\mu\text{M}$  4-nitrophenol without (a) and with (b), pH=7, 50mV/s.

**Fig. S8** (a) Chart showing reduction peak current value recorded at -0.68 V in 20  $\mu\text{M}$  2, 4-DNPH for ten consecutive readings; (b) chart showing reduction peak current value recorded at -0.68 V in 20  $\mu\text{M}$  2, 4-DNPH using five different  $(P_8W_{48}/PDDA)_7$  modified electrodes; (c) CV curves of  $(P_8W_{48}/PDDA)_7$  modified electrode in blank buffer solution (pH 7.0) during 100 scanning cycles at scan rate of 50  $\text{mV}\cdot\text{s}^{-1}$ .

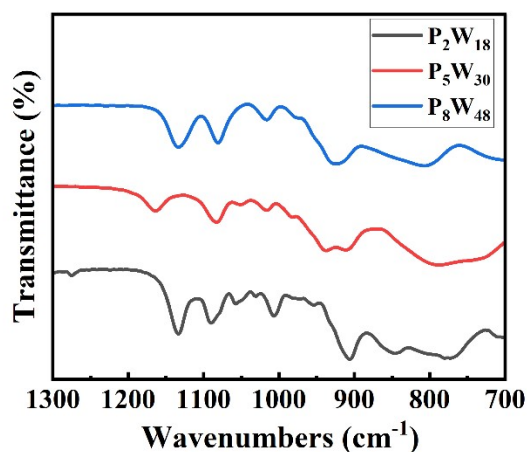

**Fig. S9** IR spectra of  $P_2W_{18}$ ,  $P_5W_{30}$  and  $P_8W_{48}$  in KBr pellets.

**Table S1.** Comparison of the electrocatalytic performance of four POMs in the solution for the reduction of 2,4-DNPH (100  $\mu\text{M}$ ) at scan rate of 50  $\text{mV}\cdot\text{s}^{-1}$ .

| No. | POM | $E_p$ (V) | $\Delta I$ (mA) |
|-----|-----|-----------|-----------------|
|-----|-----|-----------|-----------------|

|   |                                |       |       |
|---|--------------------------------|-------|-------|
| a | PW <sub>12</sub>               | -0.6  | 0.326 |
| b | P <sub>2</sub> W <sub>18</sub> | -0.48 | 0.216 |
| c | P <sub>5</sub> W <sub>30</sub> | -0.57 | 0.388 |
| d | P <sub>8</sub> W <sub>48</sub> | -0.50 | 0.399 |

**Table S2.** Comparison of the reduction potential (the potential value at which the catalytic current reaches the maximum value when the modified electrode catalyzes 2,4-DNPH) and CAT of four POMs modified electrode in pH 3.0 solution containing 0 to 100  $\mu$ M of 2,4-DNPH at scan rate of 50  $\text{mV}\cdot\text{s}^{-1}$ .

| No. | Modified electrode                                  | Reduction potential (V) | CAT(%) |
|-----|-----------------------------------------------------|-------------------------|--------|
| a   | (PW <sub>12</sub> /PDDA) <sub>6</sub>               | -0.68                   | 493.2  |
| b   | (P <sub>2</sub> W <sub>18</sub> /PDDA) <sub>6</sub> | -0.66                   | 635.1  |
| c   | (P <sub>5</sub> W <sub>30</sub> /PDDA) <sub>6</sub> | -0.76                   | 255.0  |
| d   | (P <sub>8</sub> W <sub>48</sub> /PDDA) <sub>6</sub> | -0.61                   | 1172.9 |
